# Supplementary material for: 5-methylcytosine promotes mRNA export — NSUN2 as the methyltransferase and ALYREF as an m5C reader
Source: PubMed Central journal article supplement (PMC5594206; doi:10.1038/cr.2017.55), 2017-04-18
Supplement: cr201755x7.pdf [file cr201755x7.pdf]

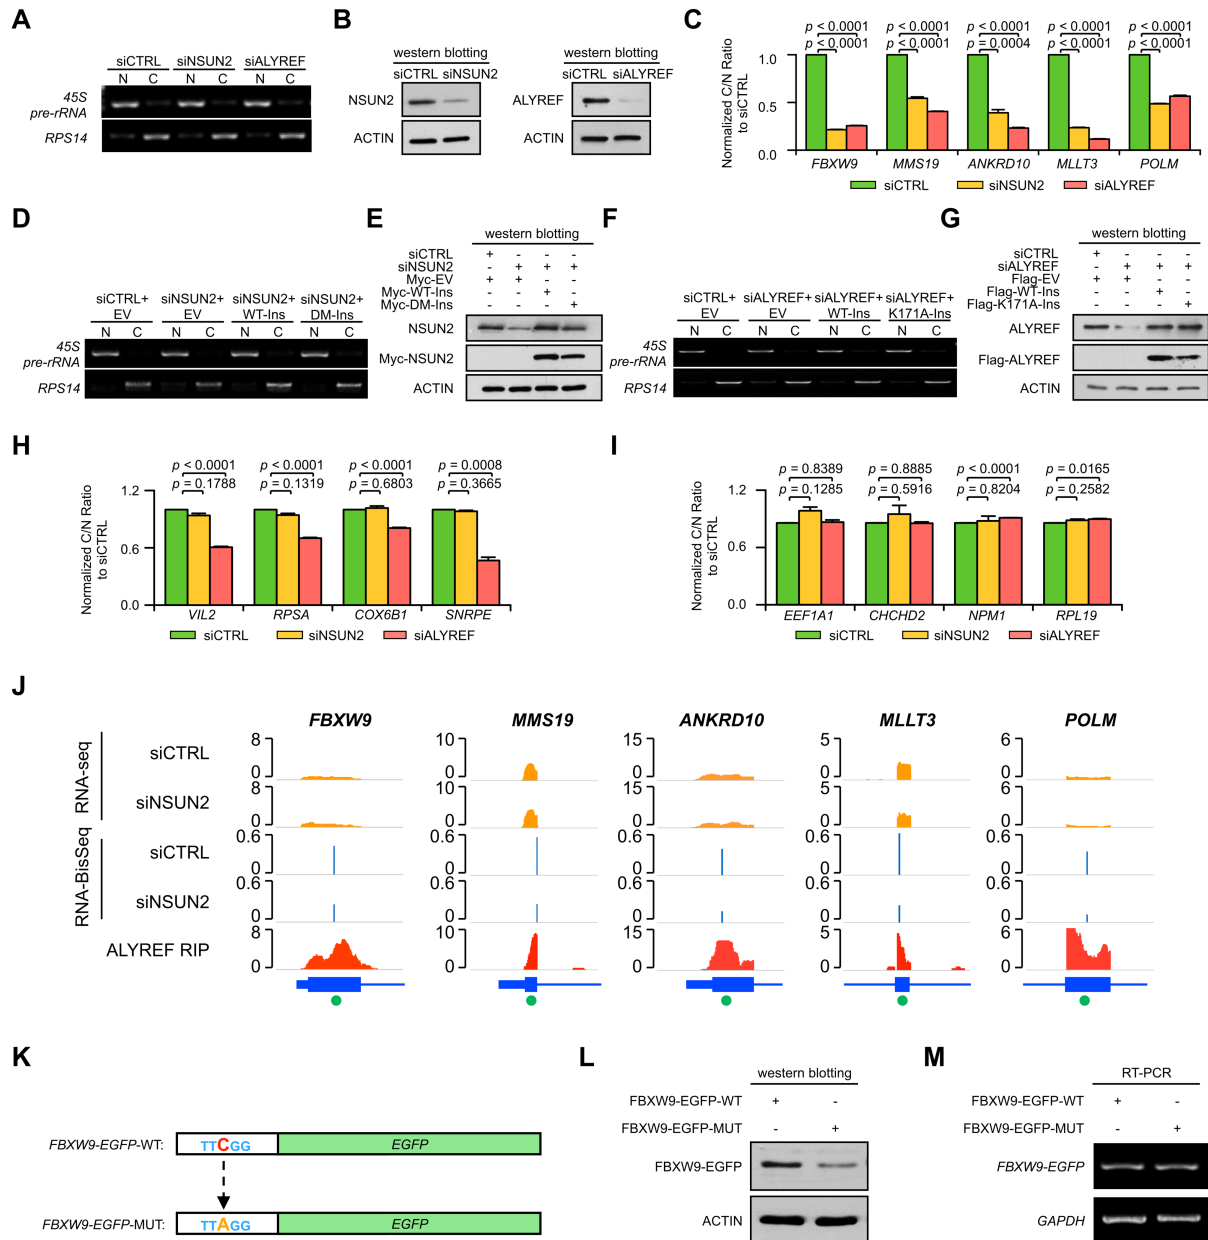

**Supplementary information, Figure S7** ALYREF mediated m<sup>5</sup>C regulates mRNA export. (A, B) RT-PCR validation of the isolated cytoplasmic and nuclear RNA fractions (A) and western blotting analysis of knockdown efficiency of NSUN2 or ALYREF (B) in the control, NSUN2 or ALYREF knockdown HeLa cells. 45S pre-rRNA and RPS14 RNA serve as nuclear and cytoplasmic RNA markers, respectively. ACTIN was used as protein loading control. (C) qPCR analysis of the relative cytoplasmic to nuclear mRNA ratios (C/N) of NSUN2 target genes with m<sup>5</sup>C modification in the control, NSUN2 or ALYREF deficient cells. (D, E) RT-PCR validation of the isolated cytoplasmic and nuclear RNA fractions (D) and western

blotting **(E)** analysis of levels of NSUN2, siNSUN2-insensitive Myc-NSUN2 wild-type (Myc-WT-Ins) and double-mutant (Myc-DM-Ins) in control and NSUN2 knockdown HeLa cells used for qPCR. **(F, G)** RT-PCR validation of the isolated cytoplasmic and nuclear RNA fractions **(F)** and western blotting **(G)** analysis levels of ALYREF, siALYREF-insensitive wild-type Flag-ALYREF (Flag-WT-Ins) and its m<sup>5</sup>C binding defective mutant (Flag-K171A-Ins) in control and ALYREF knockdown HeLa cells. **(H, I)** qPCR analysis of the relative cytoplasmic to nuclear mRNA ratios (C/N) of m<sup>5</sup>C-modified genes untargeted by NSUN2 **(H)** and genes without m<sup>5</sup>C modification **(I)** in the control, NSUN2 or ALYREF knockdown cells. **(J)** Browser representing m<sup>5</sup>C levels, RNA-seq and ALYREF RIP-seq tracks of *FBXW9*, *MMS19*, *ANKRD10*, *MLLT3*, *POLM* in control and NSUN2 knockdown HeLa cells. The RNA-seq and ALYREF RIP-seq tracks represent read counts per million mapped reads (RPM). ALYREF peaks were labeled with green dots. **(K)** Schematic representation of pEGFP-*FBXW9* minigene construct containing *FBXW9* Exon 1 with one m<sup>5</sup>C site (cytosine 215 from start codon AUG) (*FBXW9*-WT). Cytosine was mutated to Adenine to generate *FBXW9*-MUT construct. **(L, M)** Protein **(L)** and mRNA **(M)** levels of *FBXW9*-EGFP-WT and *FBXW9*-EGFP-MUT in HeLa cells. ACTIN and GAPDH serve as controls. *p* values, Student's *t*-test. Error bars, mean ± SEM (*n* = 3).
